# Supplementary material
Source: PubMed Central journal article supplement (PMC10372980)
Supplement: jmcp.2022.28.11.1292_S001.pdf [file jmcp.2022.28.11.1292_S001.pdf]

## SUPPLEMENTARY MATERIALS

### Health care costs and utilization prior to diagnosis of antineutrophil cytoplasmic antibody vasculitis in Medicare beneficiaries

Shirley P Huang, PharmD, MS; Xintong Li, MS; Binxin Cao, MPH; Joehl T Nguyen, PhD, MPH; Jacob E Robinson, MS; Vimal K Derebail, MD, MPH; Susan L Hogan, PhD, MPH; Carolyn T Thorpe, PhD, MPH

**SUPPLEMENTARY TABLE 1** Diagnosis codes used to identify systemic vasculitis patients in 2016

| <b>ICD-10-CM Code</b> | <b>Description</b>                                    |
|-----------------------|-------------------------------------------------------|
| D69.0                 | Allergic purpura                                      |
| D89.1                 | Cryoglobulinemia                                      |
| M30.0                 | Polyarthritis nodosa                                  |
| M30.1                 | Polyarteritis with lung involvement                   |
| M30.3                 | Mucocutaneous lymph node syndrome                     |
| M31.0                 | Hypersensitivity angiitis                             |
| M31.30                | Wegener's granulomatosis without renal involvement    |
| M31.31                | Wegener's granulomatosis with renal involvement       |
| M31.4                 | Aortic arch syndrome                                  |
| M31.6                 | Other giant cell arthritis                            |
| M31.7                 | Microscopic polyangiitis                              |
| M31.8                 | Other specified necrotizing vasculopathies            |
| M35.2                 | Behcet's disease                                      |
| H16.391               | Other interstitial and deep keratitis right eye       |
| H16.392               | Other interstitial and deep keratitis left eye        |
| H16.393               | Other interstitial and deep keratitis bilateral eye   |
| H16.399               | Other interstitial and deep keratitis unspecified eye |
| I77.6                 | Arteritis, unspecified                                |

**SUPPLEMENTARY TABLE 2** Number of patients with each ANCA vasculitis (AV) sub-type, in primary case-finding method, requiring  $\geq 1$  inpatient claim or  $\geq 2$  other claims with the same AV diagnosis code

| <b>Incident cases in 2016*</b>                                  | <b>AB Sample<br/>(N=730)</b> | <b>ABD Sample<br/>(N=1,626)</b> |
|-----------------------------------------------------------------|------------------------------|---------------------------------|
| Granulomatosis with polyangiitis (GPA)                          | 531 (72.7%)                  | 1,180 (72.6%)                   |
| WG without renal involvement<br>(M31.30)                        | 410 (56.2%)                  | 872 (53.6%)                     |
| WG with renal involvement<br>(M31.31)                           | 121 (16.6%)                  | 308 (18.9%)                     |
| Microscopic polyangiitis (MPA)<br>(M31.7)                       | 119 (16.3%)                  | 284 (17.5%)                     |
| Eosinophilic granulomatosis with polyangiitis (eGPA)<br>(M30.1) | 80 (11.0%)                   | 162 (10.0%)                     |

\*Without prior ICD-9-CM/ICD-10-CM codes in the previous year of 446.4 447.6, M31.30, M31.31, M31.7, M30.1, I77.6

**SUPPLEMENTARY TABLE 3** Sensitivity Analysis: Number of patients with each ANCA vasculitis (AV) sub-type, in alternative case-finding method, after requiring at least two claims of any type with the diagnosis code

| <b>Incident cases in 2016*</b>                                  | <b>AB Sample<br/>(N=615)</b> | <b>ABD Sample<br/>(N=1,380)</b> |
|-----------------------------------------------------------------|------------------------------|---------------------------------|
| Granulomatosis with polyangiitis (GPA)                          | 450 (73.2%)                  | 996 (72.2%)                     |
| WG without renal involvement<br>(M31.30)                        | 348 (56.6%)                  | 733 (53.1%)                     |
| WG with renal involvement<br>(M31.31)                           | 102 (16.6%)                  | 263 (19.1%)                     |
| Microscopic polyangiitis (MPA)<br>(M31.7)                       | 102 (16.6%)                  | 253 (18.3%)                     |
| Eosinophilic granulomatosis with polyangiitis (eGPA)<br>(M30.1) | 63 (10.2%)                   | 131 (9.5%)                      |

\*Without prior ICD-9-CM/ICD-10-CM codes in the previous year of 446.4 447.6, M31.30, M31.31, M31.7, M30.1, I77.6

**SUPPLEMENTARY TABLE 4** Sensitivity Analysis: Demographic and Clinical Characteristics of beneficiaries by insurance coverage and ANCA vasculitis (AV) diagnosis, using alternative case-finding algorithm

| Demographics                                      | Medicare Part AB Sample |                                      |                                   | Medicare Part ABD Sample |                                        |                                     |
|---------------------------------------------------|-------------------------|--------------------------------------|-----------------------------------|--------------------------|----------------------------------------|-------------------------------------|
|                                                   | Overall<br>n=1,230      | Beneficiaries<br>without AV<br>n=615 | Beneficiaries<br>with AV<br>n=615 | Overall<br>n=2,760       | Beneficiaries<br>without AV<br>n=1,380 | Beneficiaries<br>with AV<br>n=1,380 |
| Age, mean (SD)                                    | 71.58 (10.97)           | 71.58 (10.97)                        | 71.58 (10.97)                     | 70.53 (11.61)            | 70.53 (11.62)                          | 70.53 (11.62)                       |
| Female                                            | 646 (52.52%)            | 323 (52.52%)                         | 323 (52.52%)                      | 1720 (62.32%)            | 860 (62.32%)                           | 860 (62.32%)                        |
| Race                                              |                         |                                      |                                   |                          |                                        |                                     |
| Non-Hispanic White (reference)                    | 1,023 (83.17%)          | 503 (81.79%)                         | 520 (84.55%)                      | 2194 (79.49%)            | 1,080 (78.26%)                         | 1,114 (80.72%)                      |
| Non-Hispanic Black                                | 75 (6.10%)              | 51 (8.29%)                           | 24 (3.90%)*                       | 242 (8.77%)              | 152 (11.01%)                           | 90 (6.52%)**                        |
| Hispanic                                          | 81 (6.59%)              | 35 (5.69%)                           | 46 (7.48%)                        | 197 (7.14%)              | 86 (6.23%)                             | 111 (8.04%)                         |
| Other/unknown                                     | 51 (4.15%)              | 26 (4.23%)                           | 25 (4.07%)                        | 127 (4.60%)              | 62 (4.49%)                             | 65 (4.71%)                          |
| Region                                            |                         |                                      |                                   |                          |                                        |                                     |
| South (reference)                                 | 523 (42.52%)            | 284 (46.18%)                         | 239 (38.86%)                      | 1120 (40.58%)            | 625 (45.29%)                           | 495 (35.87%)                        |
| Northeast                                         | 198 (16.10%)            | 90 (14.63%)                          | 108 (17.56%)*                     | 518 (18.77%)             | 228 (16.52%)                           | 290 (21.01%)**                      |
| Midwest                                           | 260 (21.14%)            | 119 (19.35%)                         | 141 (22.93%)*                     | 616 (22.32%)             | 283 (20.51%)                           | 333 (24.13%)**                      |
| West                                              | 249 (20.24%)            | 122 (19.84%)                         | 127 (20.65%)                      | 506 (18.33%)             | 244 (17.68%)                           | 262 (18.99%)*                       |
| <b>Comorbidities</b>                              |                         |                                      |                                   |                          |                                        |                                     |
| Quan-CCI, median (IQR)                            | 2 (1, 5)                | 1 (0, 4)                             | 3 (2, 6)**                        | 3 (1, 6)                 | 1 (0, 5)                               | 3 (2, 7)**                          |
| Originally enrolled in Medicare due to disability | 278 (22.60%)            | 140 (22.76%)                         | 138 (22.44%)                      | 697 (25.25%)             | 379 (27.46%)                           | 318 (23.04%)*                       |
| <b>Insurance Coverage</b>                         |                         |                                      |                                   |                          |                                        |                                     |
| Part D enrollment                                 | -                       | -                                    | -                                 |                          |                                        |                                     |
| Medicaid (and LIS)                                | -                       | -                                    | -                                 | 709 (25.69%)             | 377 (27.32%)                           | 332 (24.06%)                        |
| LIS                                               | -                       | -                                    | -                                 | 152 (5.51%)              | 68 (4.93%)                             | 84 (6.09%)                          |
| None (No Medicaid, no LIS) (reference group)      | -                       | -                                    | -                                 | 1,899 (68.80%)           | 935 (67.75%)                           | 964 (69.86%)                        |

AV: ANCA vasculitis; SD: standard deviation; Quan-CCI: Quan-Charlson Comorbidity Index; IQR: interquartile range; LIS: low-income subsidy

\*p<.05 for comparison of beneficiaries with AV vs. without AV.

\*\*p<.001 for comparison of beneficiaries with AV vs. without AV.

**SUPPLEMENTARY TABLE 5** Sensitivity Analysis: Total one-year utilization and costs prior to diagnosis for beneficiaries with AV and matched controls (AB Sample), using alternative case-finding algorithm

|                                          | Descriptive Statistics            |                       |                                |                          | Adjusted Regression Model† |                                      |                                   |
|------------------------------------------|-----------------------------------|-----------------------|--------------------------------|--------------------------|----------------------------|--------------------------------------|-----------------------------------|
|                                          | Beneficiaries without AV<br>N=615 |                       | Beneficiaries with AV<br>N=615 |                          | Incidence Rate<br>Ratios   | Beneficiaries<br>without AV<br>N=615 | Beneficiaries<br>with AV<br>N=615 |
|                                          | Mean<br>(SD)                      | Median<br>(IQR)       | Mean<br>(SD)                   | Median<br>(IQR)          | IRR<br>[95%CI]             | Predicted Means<br>[95%CI]           | Predicted Means<br>[95%CI]        |
| <b>Medical Service Payments (USD§)</b>   |                                   |                       |                                |                          |                            |                                      |                                   |
| Total Medicare Parts A and B Payments    | 8,583<br>(25,013)                 | 1,942<br>(572, 7,220) | 17,942<br>(28,137)             | 7,174<br>(2,249, 23,755) | 2.93*<br>[2.38 - 3.59]     | 7,185<br>[5,893 - 8,476]             | 21,024<br>[18,036 - 24,013]       |
| Total Beneficiary Parts A and B Payments | 1,469<br>(2,481)                  | 604<br>(253, 1,830)   | 3,276<br>(4,029)               | 1,959<br>(721, 4,190)    | 2.44*<br>[2.09 - 2.85]     | 1,403<br>[1,230 - 1,576]             | 3,423<br>[3,081 - 3,766]          |
| <b>Drug Payments (USD§)</b>              |                                   |                       |                                |                          |                            |                                      |                                   |
| Total Medicare Part B Drug Payments      | 246<br>(1,573)                    | 11<br>(0, 66)         | 588<br>(3,052)                 | 35<br>(0, 202)           | 2.41*<br>[1.63 - 3.54]     | 221<br>[143 - 299]                   | 531<br>[337 - 725]                |
| Total Beneficiary Part B Drug Payments   | 55<br>(401)                       | 0<br>(0, 3)           | 142<br>(783)                   | 0<br>(0, 16)             | 3.48*<br>[1.89 - 6.42]     | 57<br>[20 - 94]                      | 198<br>[45 - 352]                 |
| <b>Healthcare Utilization</b>            |                                   |                       |                                |                          |                            |                                      |                                   |
| Acute Inpatient Stays                    | 0.22<br>(0.61)                    | 0<br>(0, 0)           | 0.57<br>(1.07)                 | 0<br>(0, 1)              | 2.68*<br>[2.07 - 3.46]     | 0.22<br>[0.17 - 0.27]                | 0.58<br>[0.50 - 0.67]             |
| Hospital Outpatient Visits               | 6.97<br>(20.19)                   | 2<br>(0, 6)           | 21.83<br>(51.51)               | 5<br>(1, 14)             | 2.74*<br>[2.22 - 3.40]     | 7.22<br>[6.01 - 8.43]                | 19.81<br>[16.15 - 23.47]          |
| Emergency Room Visits                    | 0.68<br>(1.58)                    | 0<br>(0, 1)           | 1.02<br>(1.97)                 | 0<br>(0, 1)              | 1.60*<br>[1.27 - 2.00]     | 0.66<br>[0.54 - 0.78]                | 1.06<br>[0.87 - 1.24]             |
| Part B Drug Events                       | 2.92<br>(6.64)                    | 2<br>(0, 3)           | 4.79<br>(13.58)                | 2<br>(0, 4)              | 1.47*<br>[1.21 - 1.79]     | 2.99<br>[2.52 - 3.47]                | 4.40<br>[3.61 - 5.19]             |
| Part B Physician Office Services         | 7.62<br>(7.84)                    | 5<br>(2, 10)          | 12.46<br>(11.03)               | 10<br>(5, 17)            | 1.69*<br>[1.52 - 1.89]     | 7.50<br>[6.89 - 8.12]                | 12.71<br>[11.36 - 14.06]          |
| Imaging                                  | 4.38<br>(6.55)                    | 2<br>(0, 6)           | 9.21<br>(9.48)                 | 7<br>(2, 14)             | 2.30*<br>[2.00 - 2.65]     | 4.21<br>[3.74 - 4.68]                | 9.69<br>[8.83 - 10.55]            |
| Tests                                    | 14.27<br>(26.21)                  | 8<br>(1, 18)          | 28.23<br>(33.07)               | 17<br>(6, 38)            | 2.14*<br>[1.83 - 2.51]     | 13.77<br>[12.07 - 15.48]             | 29.51<br>[26.50 - 32.51]          |
| Other Procedures                         | 8.25<br>(23.11)                   | 2<br>(0, 7)           | 10.34<br>(19.15)               | 5<br>(1, 11)             | 1.64*<br>[1.31 - 2.07]     | 7.18<br>[5.85 - 8.51]                | 11.80<br>[10.00 - 13.61]          |
| Durable Medical Equipment                | 2.27<br>(6.68)                    | 0<br>(0, 0)           | 3.07<br>(7.10)                 | 0<br>(0, 2)              | 1.45‡<br>[1.06 - 1.97]     | 2.25<br>[1.72 - 2.79]                | 3.27<br>[2.58 - 3.96]             |
| Other Part B Carrier Events              | 4.76<br>(22.38)                   | 1<br>(0, 4)           | 7.57<br>(28.16)                | 3<br>(0, 8)              | 1.90*<br>[1.53 - 2.35]     | 4.10<br>[3.31 - 4.88]                | 7.78<br>[6.50 - 9.07]             |

\*p <0.001

‡p=0.018

†Adjusted for age, sex, race, dual Medicaid enrollment or Part D low-income subsidy, entitlement due to disability, and US region  
AV: ANCA vasculitis, SD: standard deviation, IQR: interquartile range, IRR: incidence rate ratio, CI: confidence interval.

§Healthcare costs were measured in the one-year period prior to the index date in 2016, resulting in a combination of 2015 and 2016 USD

**SUPPLEMENTARY TABLE 6** Sensitivity Analysis: Total one-year utilization and costs prior to diagnosis for beneficiaries with AV and matched controls (ABD Sample), using alternative case-finding algorithm

|                                          | Descriptive Statistics              |                         |                                  |                           | Adjusted Regression Model†    |                                                |                                                |
|------------------------------------------|-------------------------------------|-------------------------|----------------------------------|---------------------------|-------------------------------|------------------------------------------------|------------------------------------------------|
|                                          | Beneficiaries without AV<br>N=1,380 |                         | Beneficiaries with AV<br>N=1,380 |                           | Incidence Rate<br>Ratios      | Beneficiaries<br>without AV<br>N=1,380         | Beneficiaries<br>with AV<br>N=1,380            |
|                                          | Mean<br>(SD)                        | Median<br>(IQR)         | Mean<br>(SD)                     | Median<br>(IQR)           | IRR<br>[95%CI]                | Predicted Means<br>[95%CI]                     | Predicted Means<br>[95%CI]                     |
| <b>Medical Service Payments (USD§)</b>   |                                     |                         |                                  |                           |                               |                                                |                                                |
| Total Medicare Parts A and B Payments    | 10,037<br>(19,746)                  | 3,010<br>(1,150, 8,767) | 21,519<br>(31,755)               | 10,093<br>(3,839, 28,379) | 2.68*<br>[2.38 - 3.03]        | 9,026<br>[8,138 - 9,913]                       | 24,216<br>[22,258 - 26,175]                    |
| Total Beneficiary Parts A and B Payments | 1,878<br>(3,223)                    | 834<br>(379, 2,078)     | 4,091<br>(4,876)                 | 2,424<br>(1,042, 4,982)   | 2.44*<br>[2.21 - 2.69]        | 1,770<br>[1,630 - 1,910]                       | 4,317<br>[4,035 - 4,598]                       |
| <b>Drug Payments (USD§)</b>              |                                     |                         |                                  |                           |                               |                                                |                                                |
| Total Medicare Part B Drug Payments      | 505<br>(3,175)                      | 47<br>(0, 208)          | 1,216<br>(5,917)                 | 62<br>(7, 262)            | 2.33*<br>[1.84 - 2.94]        | 419<br>[325 - 513]                             | 976<br>[751 - 1,200]                           |
| Total Beneficiary Part B Drug Payments   | 116<br>(814)                        | 0<br>(0, 7)             | 301<br>(1,514)                   | 2<br>(0, 40)              | 4.63*<br>[3.16 - 6.78]        | 105<br>[61 - 149]                              | 487<br>[243 - 730]                             |
| Total Medicare Part D Drug Payments      | 3,395<br>(12,250)                   | 822<br>(113, 2,367)     | 4,760<br>(15,000)                | 1,411<br>(336, 2,978)     | 1.61*<br>[1.39 - 1.87]        | 3,060<br>[2,615 - 3,505]                       | 4,932<br>[4,225 - 5,638]                       |
| Total Beneficiary Part D Drug Payments   | 588<br>(1,094)                      | 208<br>(57, 667)        | 1,002<br>(2,671)                 | 367<br>(94, 1,016)        | 1.46*<br>[1.31 - 1.62]        | 625<br>[571 - 679]                             | 910<br>[821 - 998]                             |
| <b>Healthcare Utilization</b>            |                                     |                         |                                  |                           |                               |                                                |                                                |
| Acute Inpatient Stays                    | 0.29<br>(0.77)                      | 0<br>(0, 0)             | 0.59<br>(1.10)                   | 0<br>(0, 1)               | 2.25*<br>[1.90 - 2.66]        | 0.28<br>[0.24 - 0.31]                          | 0.62<br>[0.56 - 0.68]                          |
| Hospital Outpatient Visits               | 8.38<br>(16.66)                     | 4<br>(1, 9)             | 27.59<br>(54.06)                 | 8<br>(3, 19.50)           | 2.82*<br>[2.49 - 3.21]        | 9.05<br>[8.19 - 9.90]                          | 25.55<br>[22.82 - 28.29]                       |
| Emergency Room Visits                    | 0.82<br>(2.18)                      | 0<br>(0, 1)             | 1.30<br>(2.89)                   | 0<br>(0, 2)               | 2.02*<br>[1.71 - 2.38]        | 0.73<br>[0.64 - 0.83]                          | 1.48<br>[1.30 - 1.66]                          |
| Part B Drug Events                       | 4.15<br>(9.10)                      | 2<br>(0, 4)             | 6.67<br>(13.26)                  | 3<br>(1, 6)               | 1.59*<br>[1.41 - 1.79]        | 4.09<br>[3.71 - 4.47]                          | 6.50<br>[5.90 - 7.10]                          |
| Part B Physician Office Services         | 9.31<br>(8.32)                      | 7<br>(4, 13)            | 14.05<br>(12.15)                 | 11<br>(6, 19)             | 1.52*<br>[1.43 - 1.62]        | 9.27<br>[8.83 - 9.71]                          | 14.13<br>[13.48 - 14.77]                       |
| Imaging                                  | 4.93<br>(6.32)                      | 3<br>(1, 7)             | 10.20<br>(10.28)                 | 8<br>(3, 14)              | 2.21*<br>[2.03 - 2.41]        | 4.78<br>[4.46 - 5.09]                          | 10.55<br>[9.97 - 11.13]                        |
| Tests                                    | 18.10<br>(24.87)                    | 11<br>(3, 23)           | 31.71<br>(34.07)                 | 21<br>(8.5, 43)           | 1.86*<br>[1.70 - 2.03]        | 17.61<br>[16.42 - 18.79]                       | 32.70<br>[30.78 - 34.61]                       |
| Other Procedures                         | 7.72<br>(15.87)                     | 3<br>(0, 7)             | 11.71<br>(20.74)                 | 6<br>(2, 13)              | 1.65*<br>[1.46 - 1.87]        | 7.36<br>[6.61 - 8.12]                          | 12.15<br>[11.06 - 13.23]                       |
| Durable Medical Equipment                | 3.62<br>(8.65)                      | 0<br>(0, 3)             | 4.67<br>(8.78)                   | 0<br>(0, 6)               | 1.39*<br>[1.18 - 1.63]        | 3.51<br>[3.07 - 3.95]                          | 4.87<br>[4.31 - 5.44]                          |
| Other Part B Carrier Events              | 5.71<br>(11.53)                     | 2<br>(0, 6)             | 10.57<br>(29.30)                 | 4<br>(1, 10)              | 1.90*<br>[1.66 - 2.17]        | 5.55<br>[4.99 - 6.12]                          | 10.53<br>[9.42 - 11.65]                        |
| Number of 30-day day of supply           | 53.37<br>(38.90)                    | 46.73<br>(25.33, 74.67) | 62.53<br>(39.72)                 | 57.10<br>(34.10, 85.63)   | 1.21*<br>[1.15 - 1.27]        | 52.52<br>[50.54 - 54.50]                       | 63.57<br>[59.60 - 67.53]                       |
| <b>Drug Class Utilization</b>            |                                     |                         |                                  |                           |                               |                                                |                                                |
|                                          | <b>N (%) with one claim</b>         |                         | <b>N (%) with one claim</b>      |                           | <b>Odds Ratio<br/>[95%CI]</b> | <b>Predicted<br/>Probabilities<br/>[95%CI]</b> | <b>Predicted<br/>Probabilities<br/>[95%CI]</b> |
| Any corticosteroid use                   | 482 (34.93%)                        |                         | 851 (61.67%)                     |                           | 3.14*<br>[2.64 - 3.73]        | 0.35<br>[0.32 - 0.37]                          | 0.62<br>[0.59 - 0.64]                          |
| Any NSAID use                            | 172 (12.46%)                        |                         | 167 (12.10%)                     |                           | 1.03<br>[0.81 - 1.31]         | 0.12<br>[0.10 - 0.14]                          | 0.12<br>[0.11 - 0.14]                          |
| Any immunosuppressant use                | 37 (2.68%)                          |                         | 221 (16.01%)                     |                           | 6.91*<br>[4.66 - 10.25]       | 0.03<br>[0.02 - 0.04]                          | 0.16<br>[0.14 - 0.18]                          |
| Any opioid use                           | 564 (40.87%)                        |                         | 661 (47.90%)                     |                           | 1.45*<br>[1.23 - 1.70]        | 0.40<br>[0.38 - 0.43]                          | 0.49<br>[0.46 - 0.51]                          |

\*p <0.001

†Adjusted for age, sex, race, dual Medicaid enrollment or Part D low-income subsidy, entitlement due to disability, and US region  
AV: ANCA vasculitis, SD: standard deviation, IQR: interquartile range, IRR: incidence rate ratio, CI: confidence interval.

§Healthcare costs were measured in the one-year period prior to the index date in 2016, resulting in a combination of 2015 and 2016 USD

**SUPPLEMENTARY TABLE 7** Sensitivity Analysis: Total costs prior to diagnosis for beneficiaries with AV and matched controls, cost by quarter, using alternative case-finding algorithm

| <b>AB Sample</b>                    |                                           |                         |                                        |                         |                                       |               |
|-------------------------------------|-------------------------------------------|-------------------------|----------------------------------------|-------------------------|---------------------------------------|---------------|
| <b>Payments (USD<sup>§</sup>)</b>   | <b>Beneficiaries without AV<br/>N=615</b> |                         | <b>Beneficiaries with AV<br/>N=615</b> |                         | <b>Adjusted Regression<br/>Model†</b> |               |
|                                     | <b>Mean<br/>(SD)</b>                      | <b>Median<br/>(IQR)</b> | <b>Mean<br/>(SD)</b>                   | <b>Median<br/>(IQR)</b> | <b>IRR<br/>[95%CI]</b>                |               |
| Q1: 10-12 months prior to diagnosis | 1,812<br>(4,951)                          | 392<br>(75, 1,206)      | 4,304<br>(10,892)                      | 665<br>(174, 2,653)     | 2.63*                                 | [2.00 - 3.46] |
| Q2: 7-9 months prior to diagnosis   | 2,253<br>(5,389)                          | 367<br>(89, 1,326)      | 4,221<br>(13,694)                      | 669<br>(155, 2,850)     | 1.91*                                 | [1.43 - 2.55] |
| Q3: 4-6 months prior to diagnosis   | 2,831<br>(12,876)                         | 408<br>(73, 1,525)      | 4,753<br>(10,528)                      | 778<br>(176, 3,726)     | 2.50*                                 | [1.91 - 3.26] |
| Q4: 0-3 months prior to diagnosis   | 3,253<br>(13,546)                         | 448<br>(100, 1,560)     | 8,470<br>(13,367)                      | 2,990<br>(853, 12,690)  | 4.51*                                 | [3.51 - 5.81] |

  

| <b>ABD Sample</b>                   |                                             |                         |                                          |                          |                                       |               |
|-------------------------------------|---------------------------------------------|-------------------------|------------------------------------------|--------------------------|---------------------------------------|---------------|
| <b>Payments (USD<sup>§</sup>)</b>   | <b>Beneficiaries without AV<br/>N=1,380</b> |                         | <b>Beneficiaries with AV<br/>N=1,380</b> |                          | <b>Adjusted Regression<br/>Model†</b> |               |
|                                     | <b>Mean<br/>(SD)</b>                        | <b>Median<br/>(IQR)</b> | <b>Mean<br/>(SD)</b>                     | <b>Median<br/>(IQR)</b>  | <b>IRR<br/>[95%CI]</b>                |               |
| Q1: 10-12 months prior to diagnosis | 3,634<br>(7,898)                            | 1,248<br>(428, 3,138)   | 6,425<br>(11,687)                        | 2,165<br>(803, 6,502)    | 1.95*                                 | [1.72 - 2.21] |
| Q2: 7-9 months prior to diagnosis   | 3,843<br>(9,292)                            | 1,211<br>(468, 3,090)   | 6,517<br>(12,713)                        | 2,246<br>(866, 7,011)    | 1.92*                                 | [1.69 - 2.19] |
| Q3: 4-6 months prior to diagnosis   | 4,252<br>(9,762)                            | 1,247<br>(443, 3,075)   | 7,488<br>(13,015)                        | 2462<br>(967, 8,966)     | 2.21*                                 | [1.93 - 2.51] |
| Q4: 0-3 months prior to diagnosis   | 4,286<br>(9,695)                            | 1,283<br>(429, 3,283)   | 11,695<br>(16,641)                       | 5,369<br>(1,923, 15,138) | 3.62*                                 | [3.19 - 4.10] |

\*p <0.001

†Adjusted for age, sex, race, dual Medicaid enrollment or Part D low-income subsidy, entitlement due to disability, and US region  
 AV: ANCA-associated vasculitis, SD: standard deviation, IQR: interquartile range, IRR: incidence rate ratio, CI: confidence interval.

§Healthcare costs were measured in the one-year period prior to the index date in 2016, resulting in a combination of 2015 and 2016 USD

**SUPPLEMENTARY TABLE 8** Sensitivity Analysis: Total one-year utilization and costs prior to diagnosis for beneficiaries with AV and matched controls (AB Sample), excluding patients with ESKD

| Adjusted Regression Model†               |                        |
|------------------------------------------|------------------------|
| Incidence Rate Ratios                    |                        |
| N=1,262                                  |                        |
| IRR                                      |                        |
| [95%CI]                                  |                        |
| <b>Medical Service Payments (USD§)</b>   |                        |
| Total Medicare Parts A and B Payments    | 2.48*<br>[2.05 - 3.00] |
| Total Beneficiary Parts A and B Payments | 2.07*<br>[1.79 - 2.39] |
| <b>Drug Payments (USD§)</b>              |                        |
| Total Medicare Part B Drug Payments      | 2.43*<br>[1.70 - 3.45] |
| Total Beneficiary Part B Drug Payments   | 4.40*<br>[2.60 - 7.45] |
| <b>Healthcare Utilization</b>            |                        |
| Acute Inpatient Stays                    | 2.76*<br>[2.16 - 3.53] |
| Hospital Outpatient Visits               | 1.61*<br>[1.36 - 1.91] |
| Emergency Room Visits                    | 1.51*<br>[1.20 - 1.91] |
| Part B Drug Events                       | 1.46*<br>[1.21 - 1.75] |
| Part B Physician Office Services         | 1.66*<br>[1.50 - 1.84] |
| Imaging                                  | 2.43*<br>[2.13 - 2.77] |
| Tests                                    | 2.12*<br>[1.83 - 2.44] |
| Other Procedures                         | 1.70*<br>[1.38 - 2.10] |
| Durable Medical Equipment                | 1.47‡<br>[1.10 - 1.98] |
| Other Part B Carrier Events              | 1.70*<br>[1.39 - 2.09] |

\*p < 0.001

‡p=0.010

†Adjusted for age, sex, race, dual Medicaid enrollment or Part D low-income subsidy, entitlement due to disability, and US region  
 AV: ANCA vasculitis, SD: standard deviation, IQR: interquartile range, IRR: incidence rate ratio, CI: confidence interval, ESKD: end-stage kidney disease

§Healthcare costs were measured in the one-year period prior to the index date in 2016, resulting in a combination of 2015 and 2016 USD

**SUPPLEMENTARY TABLE 9** Sensitivity Analysis: Total one-year utilization and costs prior to diagnosis for beneficiaries with AV and matched controls (ABD Sample), excluding patients with ESKD

| Adjusted Regression Model†               |                         |
|------------------------------------------|-------------------------|
| Incidence Rate Ratios                    |                         |
| N=2,844                                  |                         |
| IRR                                      |                         |
| [95%CI]                                  |                         |
| <b>Medical Service Payments (USD§)</b>   |                         |
| Total Medicare Parts A and B Payments    | 2.46*<br>[2.19 - 2.76]  |
| Total Beneficiary Parts A and B Payments | 2.18*<br>[1.98 - 2.39]  |
| <b>Drug Payments (USD§)</b>              |                         |
| Total Medicare Part B Drug Payments      | 2.35*<br>[1.87 - 2.94]  |
| Total Beneficiary Part B Drug Payments   | 4.97*<br>[3.45 - 7.16]  |
| Total Medicare Part D Drug Payments      | 1.49*<br>[1.29 - 1.73]  |
| Total Beneficiary Part D Drug Payments   | 1.45*<br>[1.30 - 1.61]  |
| <b>Healthcare Utilization</b>            |                         |
| Acute Inpatient Stays                    | 2.41*<br>[2.05 - 2.83]  |
| Hospital Outpatient Visits               | 1.80*<br>[1.62 - 2.00]  |
| Emergency Room Visits                    | 1.96*<br>[1.66 - 2.30]  |
| Part B Drug Events                       | 1.63*<br>[1.45 - 1.82]  |
| Part B Physician Office Services         | 1.58*<br>[1.49 - 1.68]  |
| Imaging                                  | 2.37*<br>[2.18 - 2.58]  |
| Tests                                    | 1.92*<br>[1.77 - 2.09]  |
| Other Procedures                         | 1.68*<br>[1.48 - 1.90]  |
| Durable Medical Equipment                | 1.50*<br>[1.28 - 1.76]  |
| Other Part B Carrier Events              | 1.94*<br>[1.71 - 2.21]  |
| Number of 30-day day of supply           | 1.21*<br>[1.16 - 1.28]  |
| <b>Drug Class Utilization</b>            |                         |
| Any corticosteroid use                   | 3.20*<br>[2.70 - 3.79]  |
| Any NSAID use                            | 1.12‡<br>[0.89 - 1.41]  |
| Any immunosuppressant use                | 6.91*<br>[4.66 - 10.24] |
| Any opioid use                           | 1.52*<br>[1.30 - 1.78]  |

\*p < 0.001

‡p=0.347

†Adjusted for age, sex, race, dual Medicaid enrollment or Part D low-income subsidy, entitlement due to disability, and US region  
 AV: ANCA vasculitis, SD: standard deviation, IQR: interquartile range, IRR: incidence rate ratio, CI: confidence interval, ESKD: end-stage kidney disease

§Healthcare costs were measured in the one-year period prior to the index date in 2016, resulting in a combination of 2015 and 2016 USD

**SUPPLEMENTARY TABLE 10** Sensitivity Analysis: Total costs prior to diagnosis for beneficiaries with AV and matched controls, cost by quarter, excluding patients with ESKD

| <b>AB Sample</b>                    |                                           |                         |                                        |                         |                                       |
|-------------------------------------|-------------------------------------------|-------------------------|----------------------------------------|-------------------------|---------------------------------------|
| <b>Payments (USD<sup>§</sup>)</b>   | <b>Beneficiaries without AV<br/>N=631</b> |                         | <b>Beneficiaries with AV<br/>N=631</b> |                         | <b>Adjusted Regression<br/>Model†</b> |
|                                     | <b>Mean<br/>(SD)</b>                      | <b>Median<br/>(IQR)</b> | <b>Mean<br/>(SD)</b>                   | <b>Median<br/>(IQR)</b> | <b>IRR<br/>[95% CI]</b>               |
| Q1: 10-12 months prior to diagnosis | 1,729<br>(4,265)                          | 393<br>(82, 1,213)      | 3,580<br>(10,623)                      | 606<br>(166, 2,077)     | 1.89*<br>[1.45 - 2.46]                |
| Q2: 7-9 months prior to diagnosis   | 2,226<br>(5,499)                          | 394<br>(116, 1,372)     | 3,508<br>(13,325)                      | 650<br>(142, 2,259)     | 1.46 <sup>‡</sup><br>[1.11 - 1.92]    |
| Q3: 4-6 months prior to diagnosis   | 2,974<br>(12,987)                         | 426<br>(102, 1,493)     | 3,609<br>(8,745)                       | 638<br>(146, 2,522)     | 1.66*<br>[1.28 - 2.15]                |
| Q4: 0-3 months prior to diagnosis   | 3,350<br>(13,319)                         | 476<br>(124, 1,787)     | 8,195<br>(12,886)                      | 3,010<br>(938, 9,995)   | 3.93*<br>[3.08 - 5.00]                |

  

| <b>ABD Sample</b>                   |                                             |                         |                                          |                          |                                       |
|-------------------------------------|---------------------------------------------|-------------------------|------------------------------------------|--------------------------|---------------------------------------|
| <b>Payments (USD<sup>§</sup>)</b>   | <b>Beneficiaries without AV<br/>N=1,422</b> |                         | <b>Beneficiaries with AV<br/>N=1,422</b> |                          | <b>Adjusted Regression<br/>Model†</b> |
|                                     | <b>Mean<br/>(SD)</b>                        | <b>Median<br/>(IQR)</b> | <b>Mean<br/>(SD)</b>                     | <b>Median<br/>(IQR)</b>  | <b>IRR<br/>[95% CI]</b>               |
| Q1: 10-12 months prior to diagnosis | 3,522<br>(7,762)                            | 1,215<br>(421, 3,028)   | 5,182<br>(11,229)                        | 1,870<br>(722, 4,601)    | 1.63*<br>[1.44 - 1.84]                |
| Q2: 7-9 months prior to diagnosis   | 3,732<br>(9,584)                            | 1,183<br>(459, 3,020)   | 5,338<br>(11,595)                        | 1,920<br>(748, 4,786)    | 1.63*<br>[1.44 - 1.85]                |
| Q3: 4-6 months prior to diagnosis   | 3,983<br>(9,373)                            | 1,244<br>(420, 3,056)   | 6,422<br>(12,301)                        | 2,157<br>(882, 6,086)    | 1.94*<br>[1.71 - 2.20]                |
| Q4: 0-3 months prior to diagnosis   | 4,147<br>(9,267)                            | 1,246<br>(417, 3,277)   | 11,035<br>(16,970)                       | 4,935<br>(1,926, 13,304) | 3.51*<br>[3.11 - 3.96]                |

\*p < 0.001

<sup>‡</sup>p = 0.007

†Adjusted for age, sex, race, dual Medicaid enrollment or Part D low-income subsidy, entitlement due to disability, and US region  
AV: ANCA vasculitis, SD: standard deviation, IQR: interquartile range, IRR: incidence rate ratio, CI: confidence interval, ESKD: end-stage kidney disease

<sup>§</sup>Healthcare costs were measured in the one-year period prior to the index date in 2016, resulting in a combination of 2015 and 2016 USD
